# Supplementary material for: Homointerface covalent organic framework membranes for efficient desalination
Source: Royal Society of Chemistry journal article supplement (doi:10.1039/d1ta06439h), 2021-01-01
Supplement: d1ta06439h1.pdf [file d1ta06439h1.pdf]

## Supporting Information

# Homointerface covalent organic framework membranes for efficient desalination

Jianliang Shen,<sup>ab#</sup> Jinqiu Yuan,<sup>ab#</sup> Benbing Shi,<sup>ab</sup> Xinda You,<sup>ab</sup> Rui Ding,<sup>ab</sup> Tianyi Zhang,<sup>ab</sup> Yujing Zhang,<sup>ab</sup> Yuanzhi Deng,<sup>ab</sup> Jingyuan Guan,<sup>ab</sup> Mengying Long,<sup>ab</sup> Yu Zheng,<sup>ab</sup> Runnan Zhang,<sup>\*abc</sup> Hong Wu<sup>abc</sup> and Zhongyi Jiang<sup>\*abcd</sup>

<sup>a</sup> Key Laboratory for Green Chemical Technology of Ministry of Education, School of Chemical Engineering and Technology, Tianjin University, Tianjin 300072, China.

<sup>b</sup> Collaborative Innovation Center of Chemical Science and Engineering (Tianjin), Tianjin 300072, China.

<sup>c</sup> Zhejiang Institute of Tianjin University, Ningbo, Zhejiang 315201, China.

<sup>d</sup> Joint School of National University of Singapore and Tianjin University, International Campus of Tianjin University, Binhai New City, Fuzhou 350207, China.

<sup>e</sup> Tianjin Key Laboratory of Membrane Science and Desalination Technology, Tianjin University, Tianjin 300072, China.

<sup>#</sup> These authors contributed equally to this work.

<sup>\*</sup> E-mail address: [zhyjiang@tju.edu.cn](mailto:zhyjiang@tju.edu.cn). (Z., Jiang)

<sup>\*</sup> E-mail address: [runnan.zhang@tju.edu.cn](mailto:runnan.zhang@tju.edu.cn). (R., Zhang)

# 1. Methods

## 1.1 Materials

All chemicals and solvents were commercially available and used as received. 2,5-Diaminobenzenesulfonic acid (DABA) was purchased from Saen chemical technology (Shanghai) Co., Ltd. 1,3,5-Triformylphloroglucinol (TFP) was supplied by Jilin Chinese Academy of Sciences-Yanshen Technology Co., Ltd. p-Phenylenediamine (PA), 1,3,5-trimethylbenzene and acetic acid were provided by Shanghai Aladdin Biochemical Technology Co., Ltd. Hydrazine hydrate ( $\text{N}_2\text{H}_4$ ) was obtained from Tianjin Jiangtian chemical technology co., Ltd. Sodium sulfate ( $\text{Na}_2\text{SO}_4$ ), magnesium sulfate ( $\text{MgSO}_4$ ), magnesium chloride ( $\text{MgCl}_2$ ) and sodium chloride ( $\text{NaCl}$ ) were obtained from Tianjin Kemiou Chemical Reagent Co. Ltd. Dopamine hydrochloride was purchased from Shanghai Macklin Biochemical Co., Ltd. Tris(hydroxymethyl) aminomethane-hydrochloric acid buffer (Tris-HCl, 50.0 mM, pH=8.5) was purchased from Nanjing Senbeijia Biotech Co., Ltd. Deionized water (DI) was obtained from a Milli-Q reverse osmosis system (Millipore, US). Polyacrylonitrile supports (PAN, MWCO=100 kDa) were purchased from Lanjing Membrane Technology Co., Ltd (Shandong, China).

## 1.2 Characterization

**SEM.** The surface and cross-sectional morphologies of the membranes were conducted by a field emission scanning electron microscopy (Hitachi S4800, Japan). All the membrane samples were sputtered with Au by a Q150T turbo-pumped sputter coater with the current of 25 mA for 120 s before SEM characterization.

**TEM.** The cross-sectional images of the membranes were obtained by a transmission electron microscopy (JEOL-2100F, Japan). Membrane sample was embedded by epoxy resin and then cut into slices (about 100 nm in thickness) by an ultramicrotome (Leica Ultracut R). Then, a microgrid copper was used to load these slice-shaped samples.

**AFM.** Three-dimensional morphology of the surface of COF membranes was characterized by Atomic force

microscopy (AFM, NTEGRA spectra, Russia).

**Contact angle measurements.** Contact angles of the membranes were measured with a deionized water droplet of 3.0  $\mu\text{L}$  on membrane surface adopting a contact angle goniometer (JC2000C Contact Angle Meter, China). A high-speed camera was used to capture the instantaneous water contact angle of the membranes. Five membrane samples were measured and the values reported were averaged.

**Zeta potential.** The surface zeta potential of the membranes was performed by a SurPASS electrokinetic analyzer (Anton Paar KG, Austria) at room temperature ( $25 \pm 1$  °C). For each measurement, the membrane samples ( $1\text{ cm} \times 0.5\text{ cm}$ ) were attached to a holder to contact with 1  $\text{mmol L}^{-1}$  KCl solution ( $\text{pH}=6.0 \pm 0.2$ ). Each membrane sample was tested at least five times to obtain an average value.

## 2. Figures

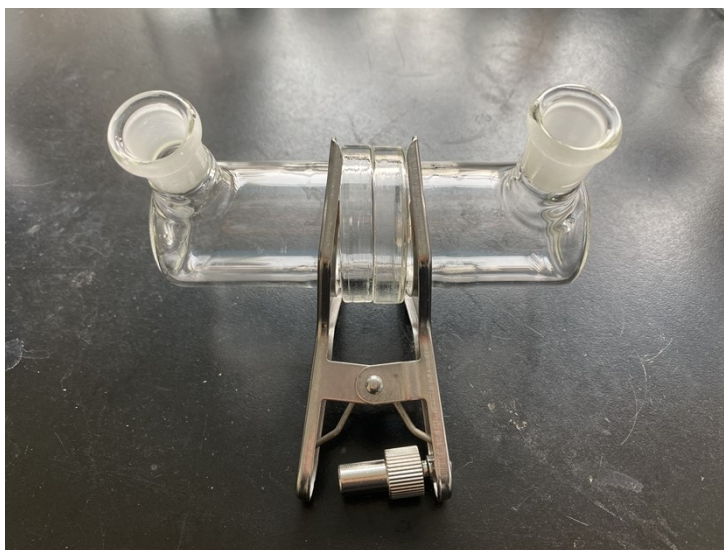

**Fig. S1** Home-made diffusion cell.

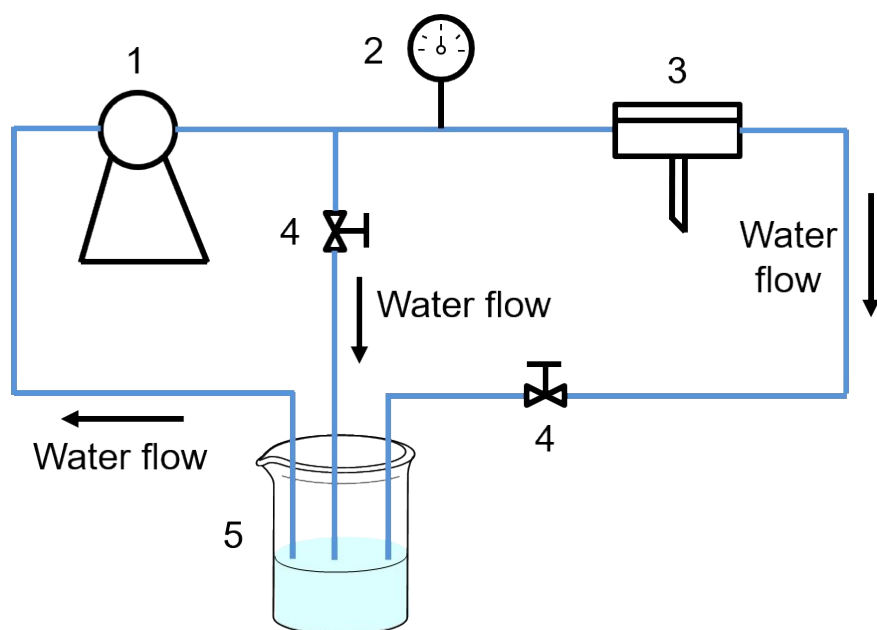

1 Pump; 2 Pressure gage; 3 Membrane cell;  
4 valve; 5 Feed tank

**Fig. S2** Cross-flow filtration system for evaluating desalination performance of the membranes. Flow velocity: 45

L h<sup>-1</sup>, driving pressure: 5.0 bar, effective filtration area: 3.14 cm<sup>2</sup>.

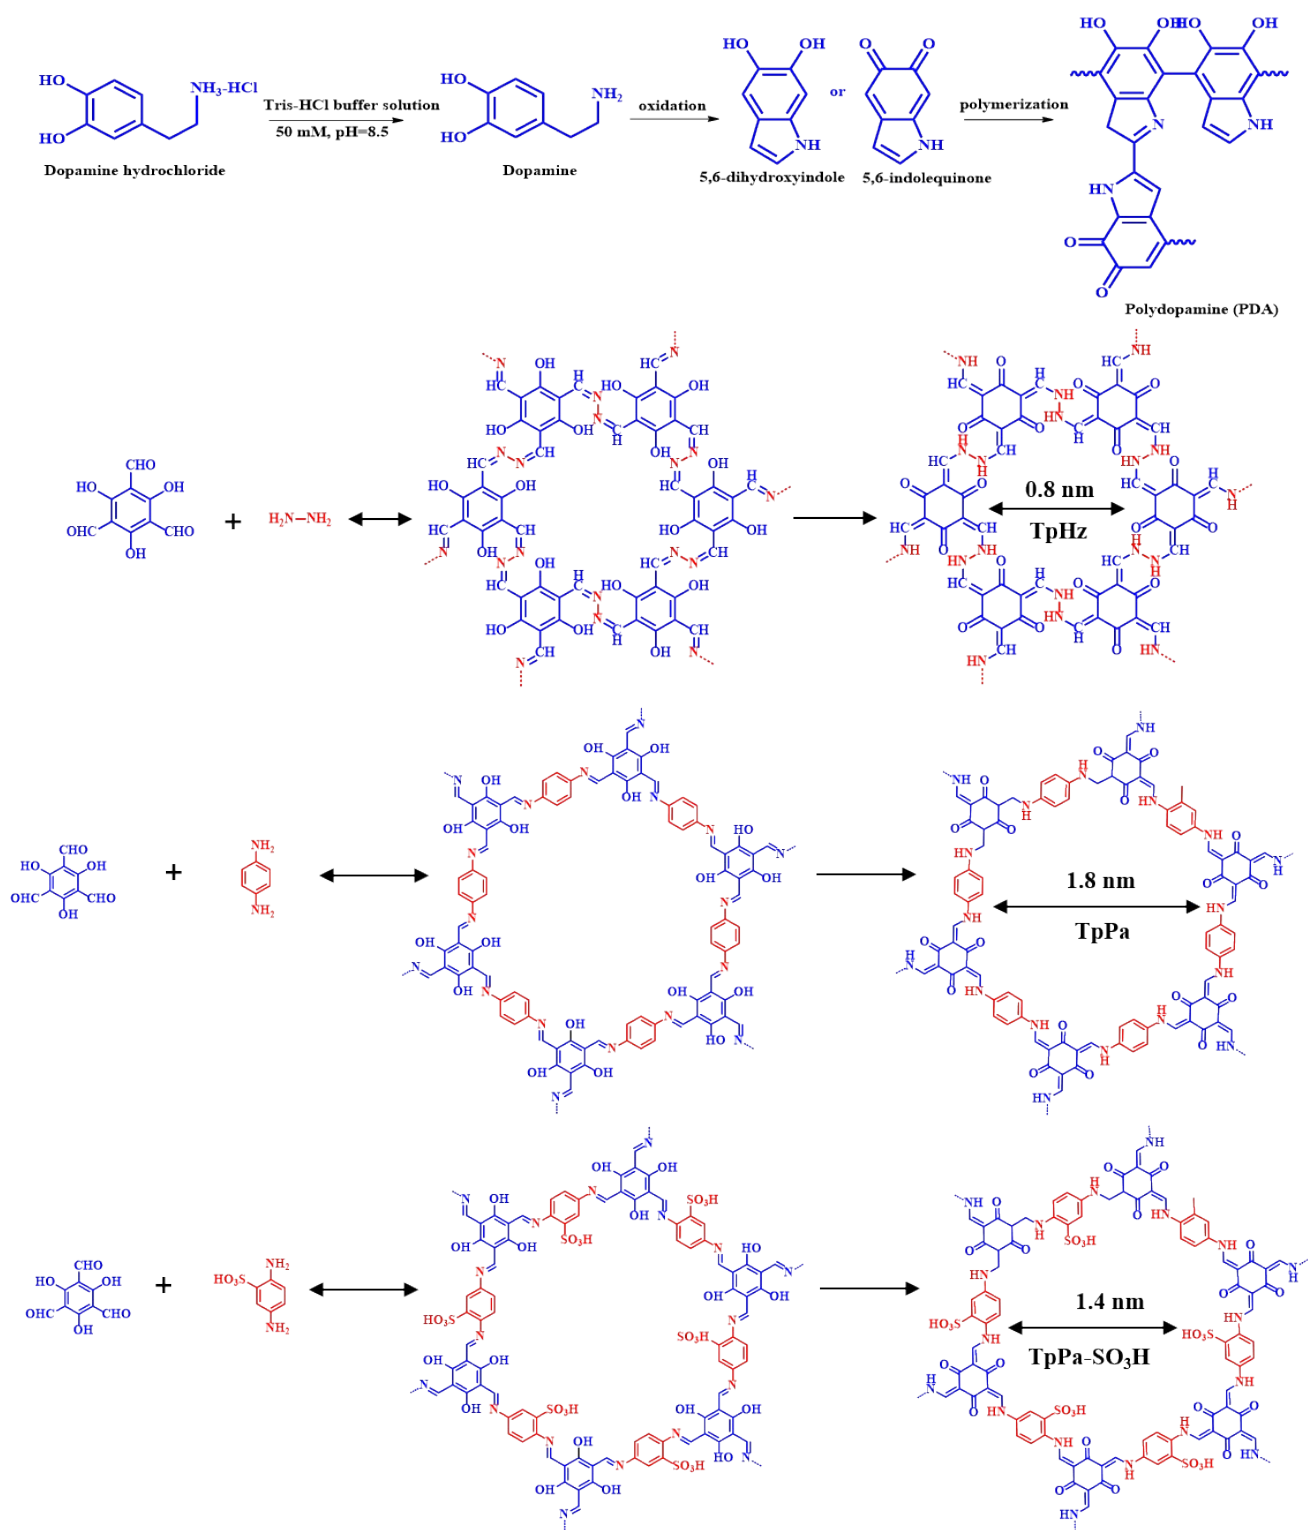

Fig. S3 Reaction route of polydopamine and COFs.

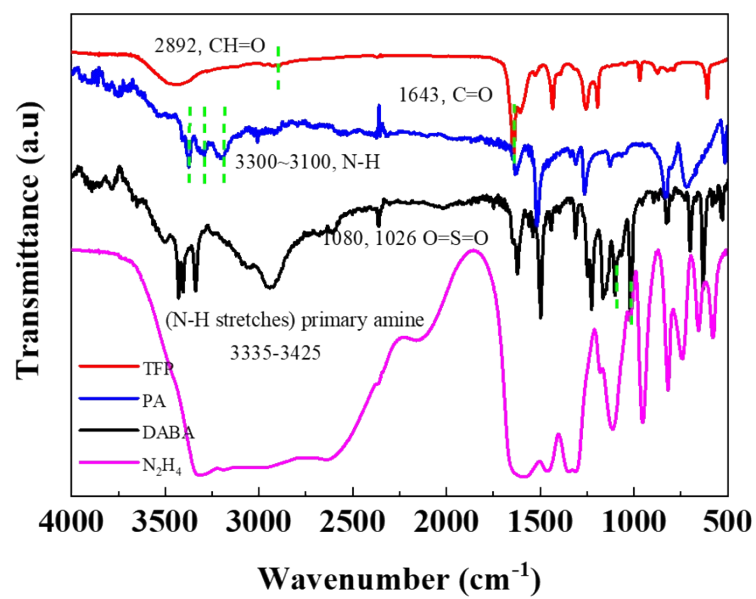

**Fig. S4** FTIR spectrum of the building monomers.

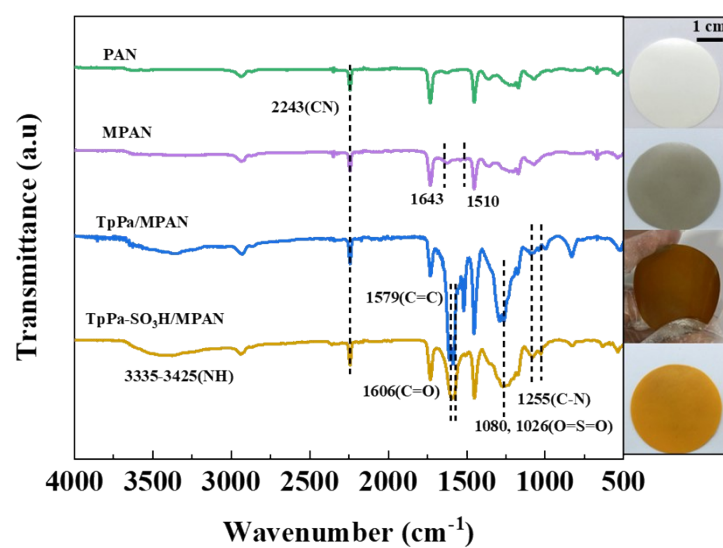

**Fig. S5** ATR-FTIR spectrum of the supports and COF membranes with single layer. From top to bottom: PAN support, MPAN support, TpPa/MPAN and TpPa-SO<sub>3</sub>H/MPAN membranes.



TpPa

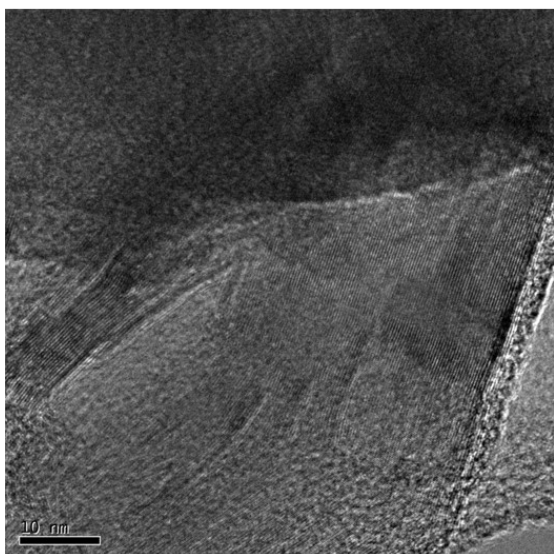

TpPa-SO<sub>3</sub>H

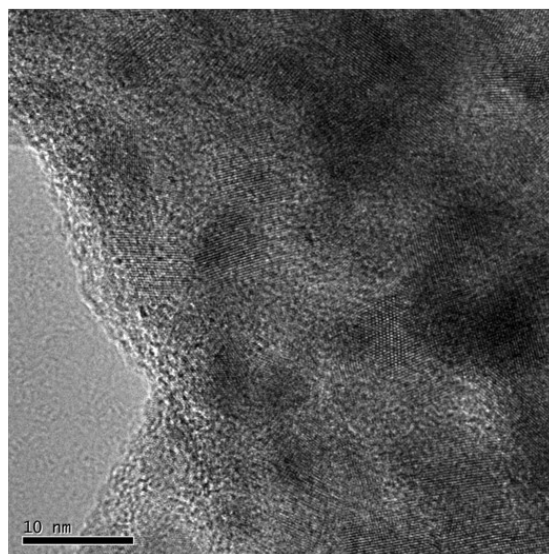

**Fig. S6** High-resolution TEM of TpPa and TpPa-SO<sub>3</sub>H nanofilms.

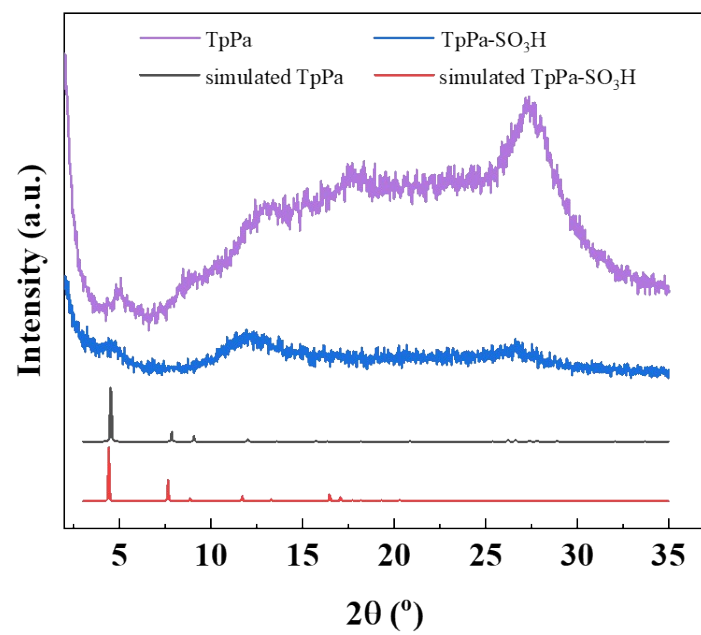

**Fig. S7** XRD pattern of the single layer COF membranes and the simulated COFs.

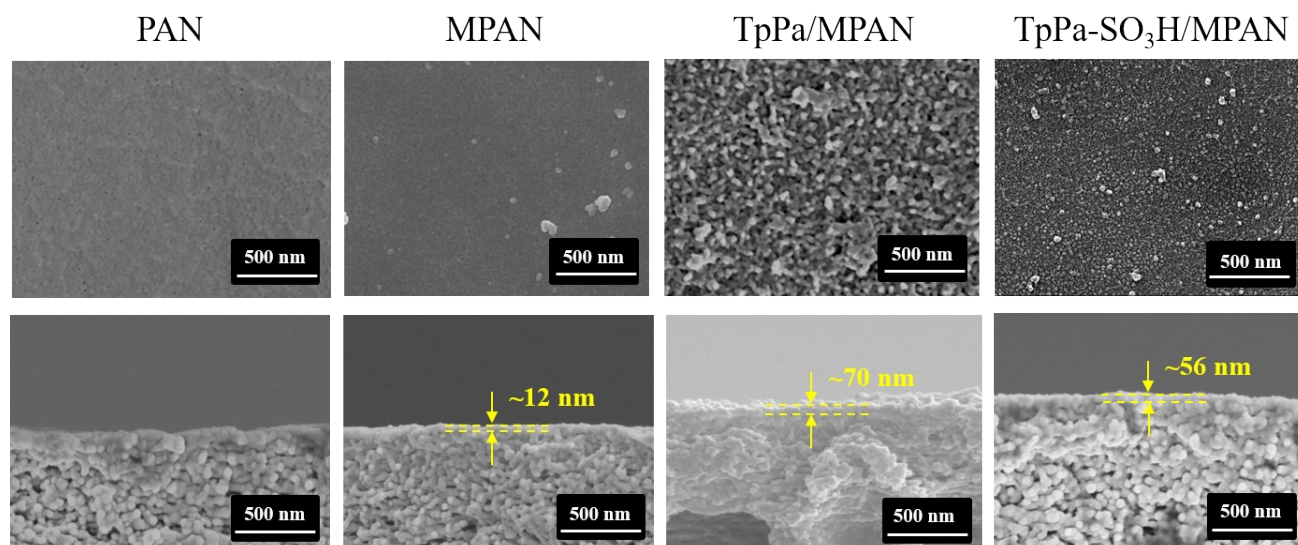

**Fig. S8** Surface and cross-sectional SEM images of the membranes.

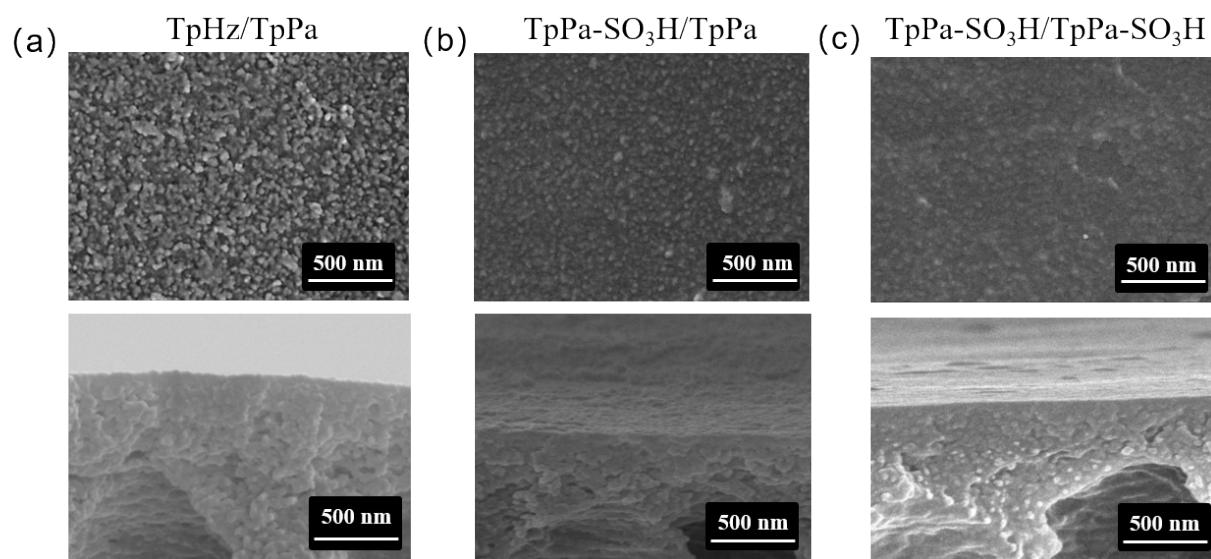

**Fig. S9** Surface and cross-sectional SEM images of the bilayer COF membranes.

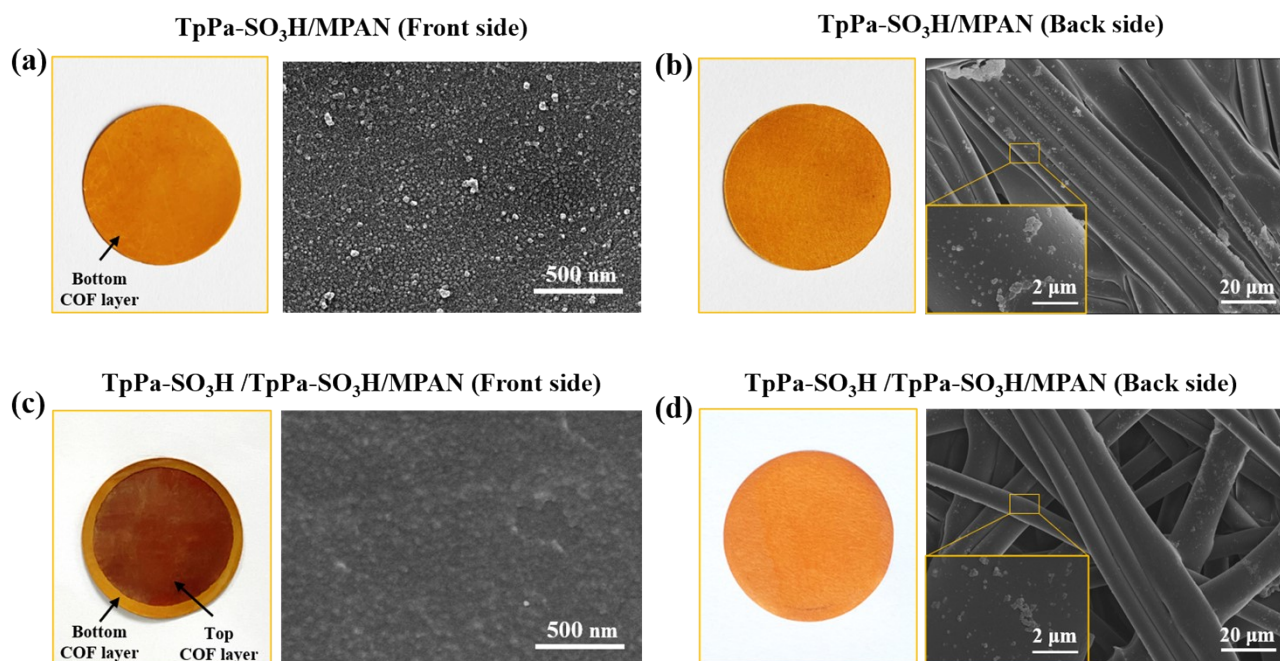

**Fig. S10** The digital photographs (left) and surface SEM images (right) of the top side of TpPa-SO<sub>3</sub>H/MPAN (a) and TpPa-SO<sub>3</sub>H/TpPa-SO<sub>3</sub>H/MPAN (c). The digital photographs (left) and surface SEM images (right) of the bottom side of TpPa-SO<sub>3</sub>H/MPAN (b) and TpPa-SO<sub>3</sub>H/TpPa-SO<sub>3</sub>H/MPAN (d). Insets show an image at a higher magnification.

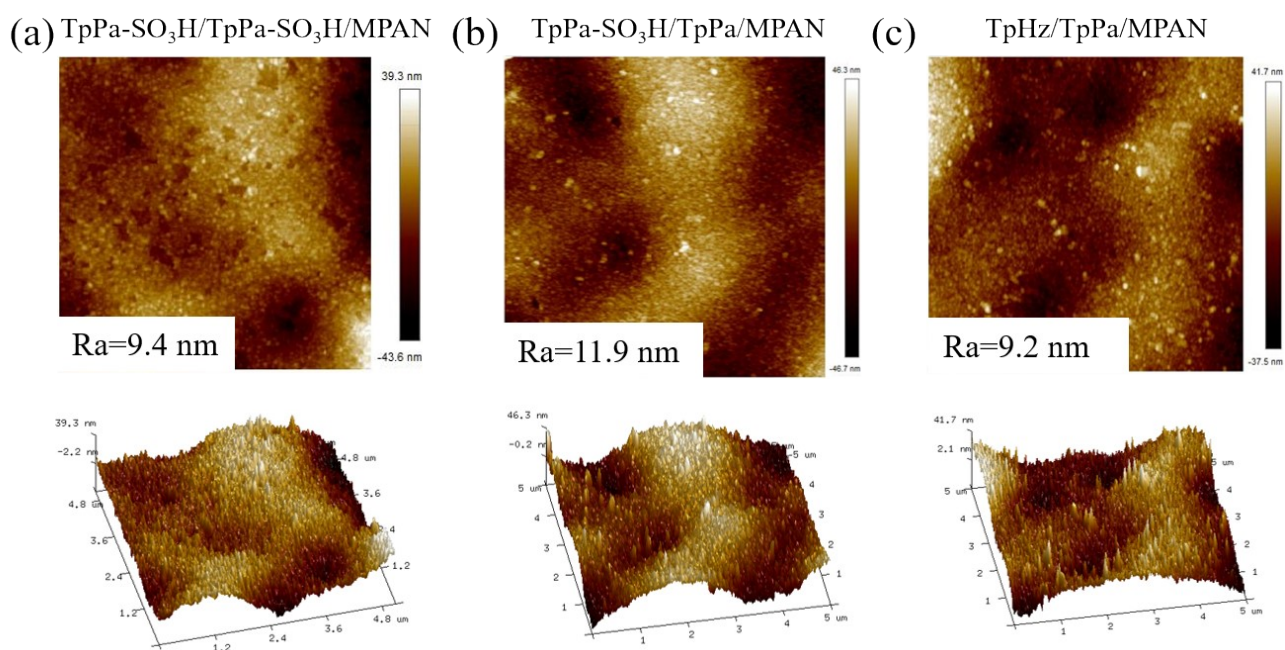

**Fig. S11** AFM topography of bilayer COF membranes. Scanning area: 5 μm by 5 μm.

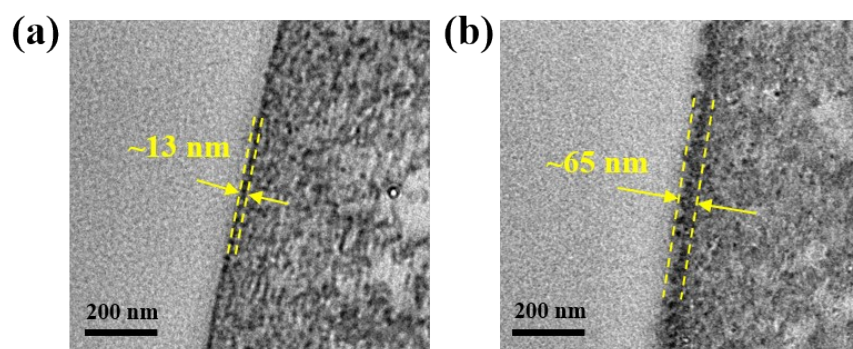

**Fig. S12** Cross-sectional TEM images of (a) MPAN support, (b) TpPa/MPAN membrane.



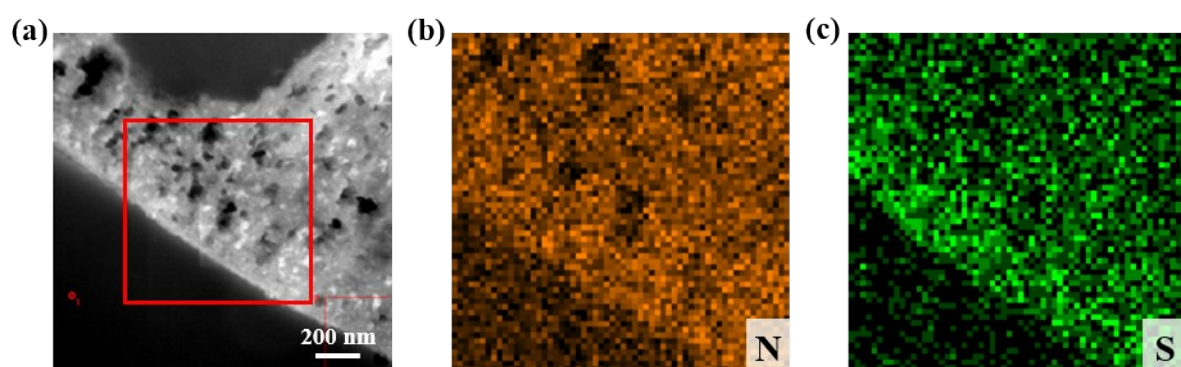

**Fig. S13** (a) Dark-field cross-sectional TEM images and corresponding element maps of (b) N, (c) S of TpPa-SO<sub>3</sub>H/MPAN membrane.



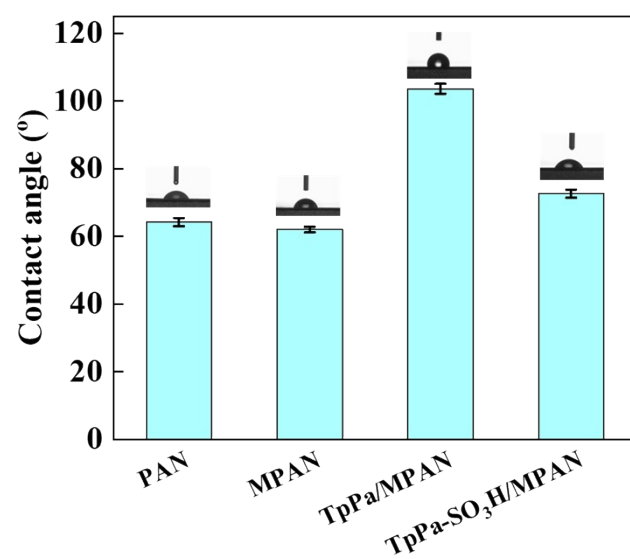

**Fig. S14** Water contact angle of the supports and COF membranes with single layer.

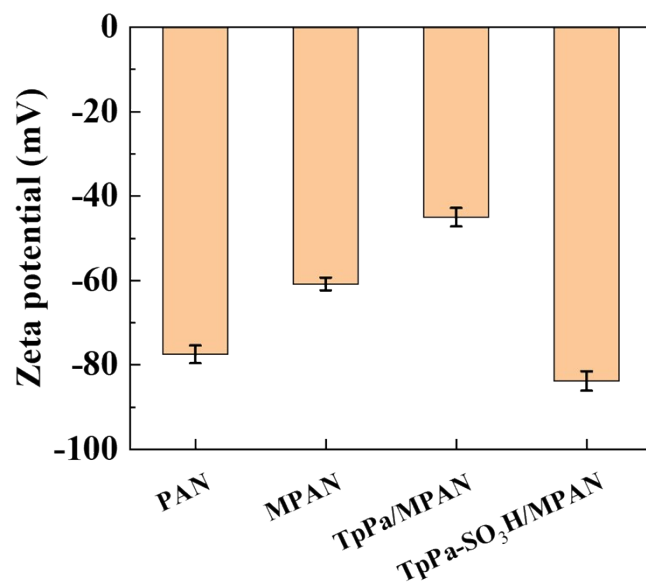

**Fig. S15** Zeta potential of the supports and COF membranes with single layer.

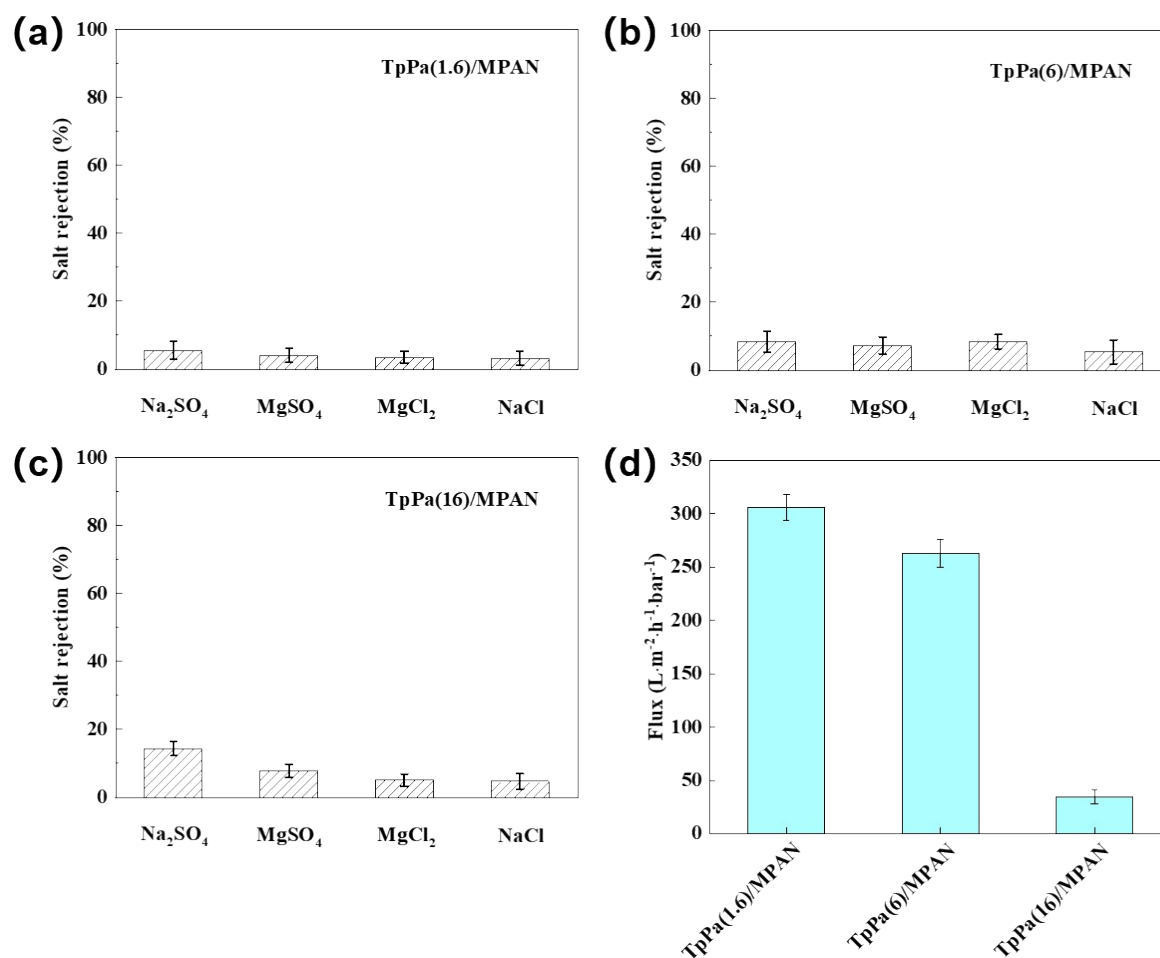

**Fig. S16** Salt rejection of (a-c) and water flux (d) of TpPa/MPAN membranes prepared *via in situ* growth technique at room temperature.

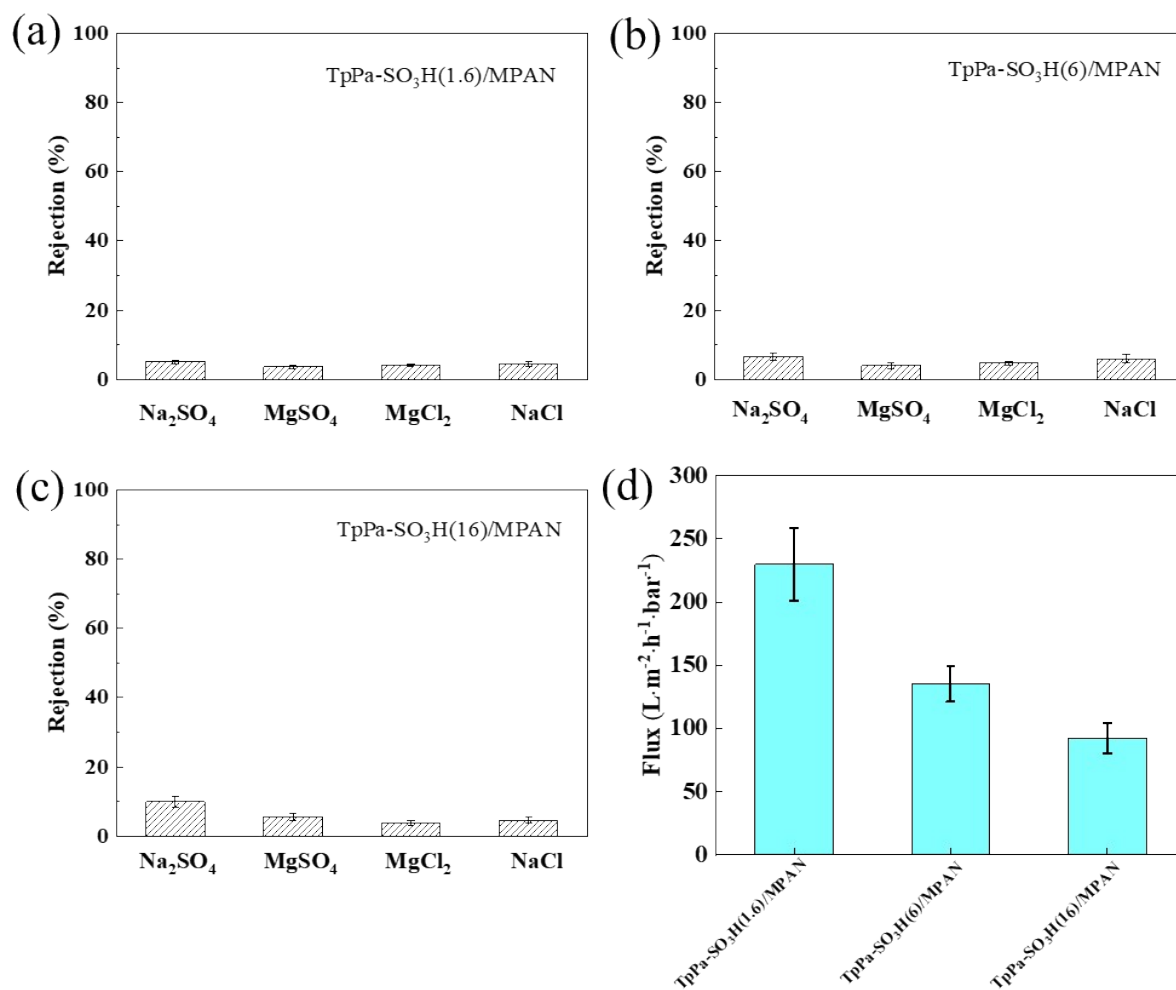

**Fig. S17** Salt rejection (a-c) and water flux (d) of TpPa-SO<sub>3</sub>H/MPAN membranes prepared *via in situ* growth technique at room temperature.

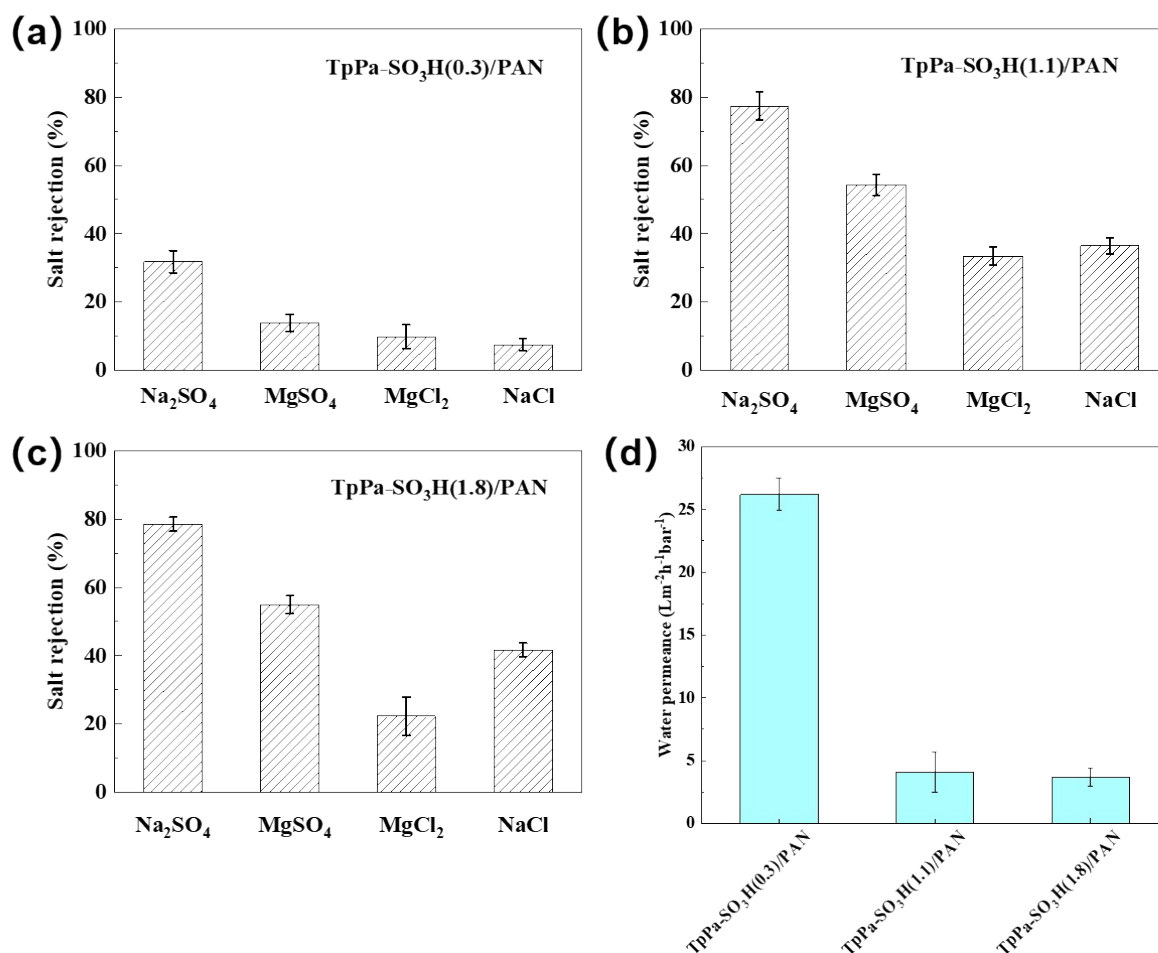

**Fig. S18** Effect of monomer concentration on (a-c) salt rejection and (d) water permeance of TpPa-SO<sub>3</sub>H/PAN

membranes prepared by counter-diffusion approach under room temperature.

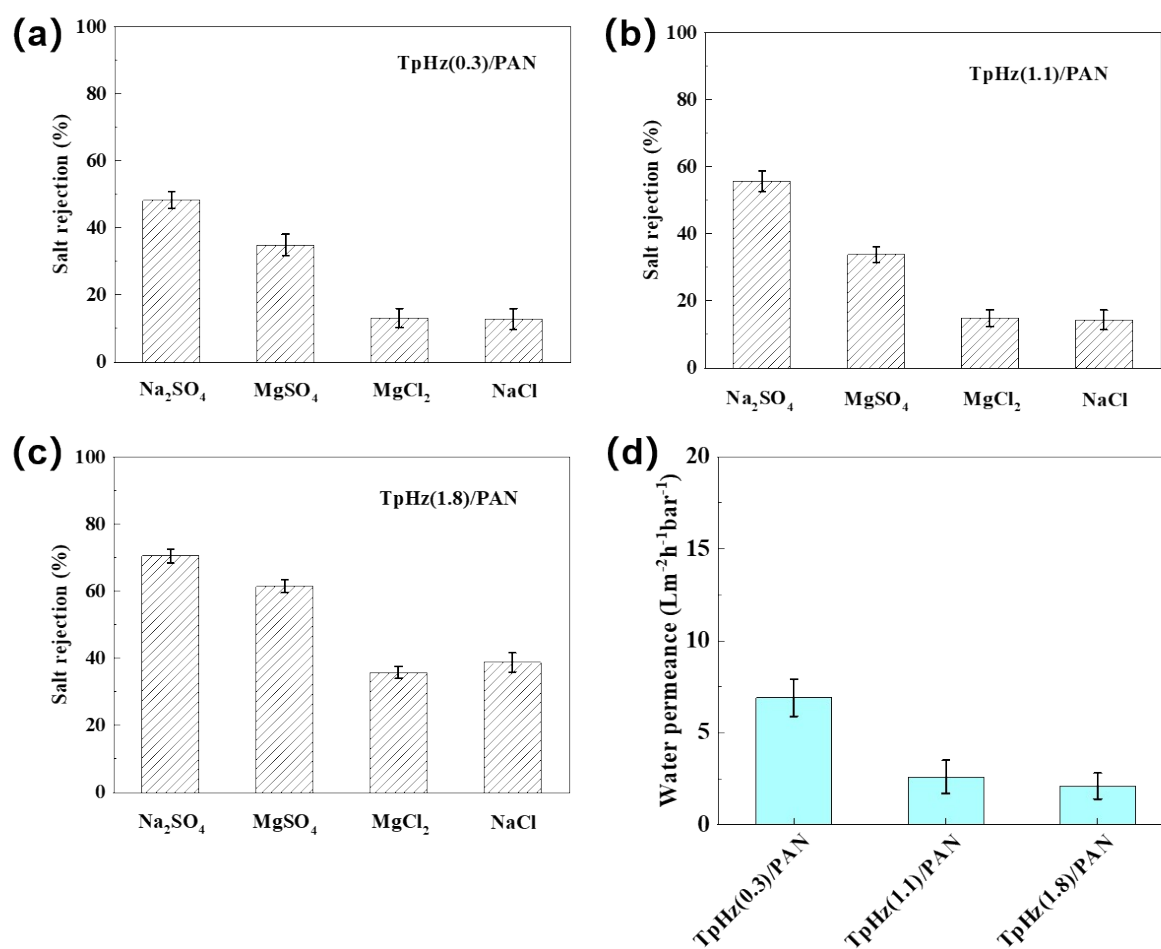

**Fig. S19** Effect of monomer concentration on (a-c) salt rejection and (d) water permeance of TpHz/PAN

membranes prepared by counter-diffusion approach under room temperature.

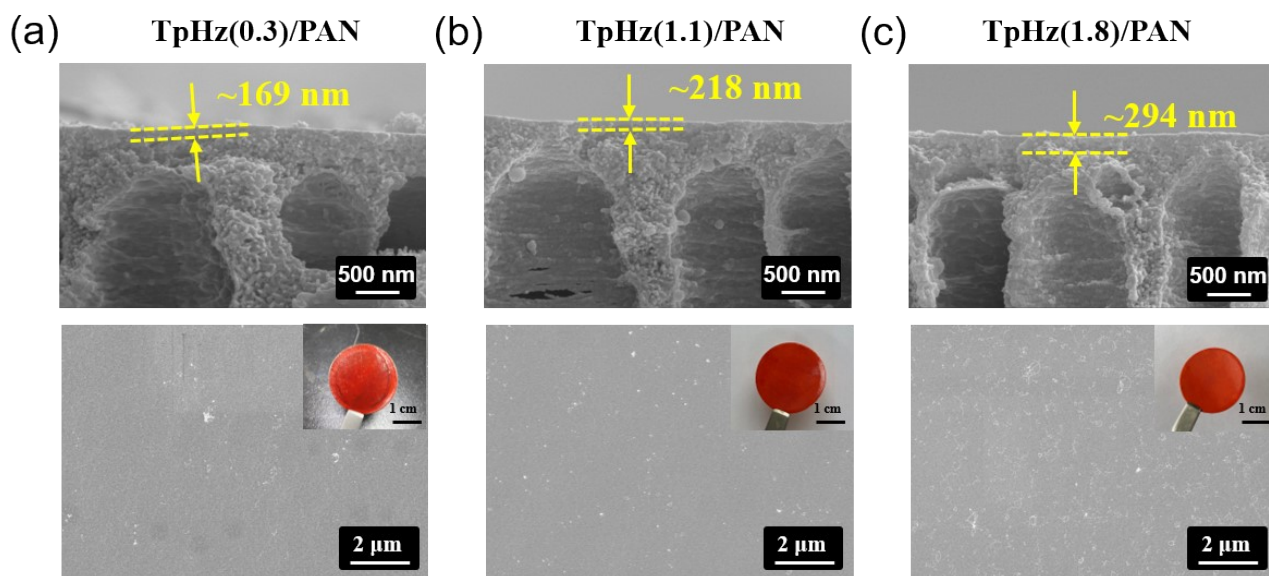

**Fig. S20** SEM images of the TpHz/PAN membranes prepared via counter-diffusion approach under room temperature.

(a) TpPa-SO<sub>3</sub>H(0.3)/PAN (b) TpPa-SO<sub>3</sub>H(1.1)/PAN (c) TpPa-SO<sub>3</sub>H(1.8)/PAN

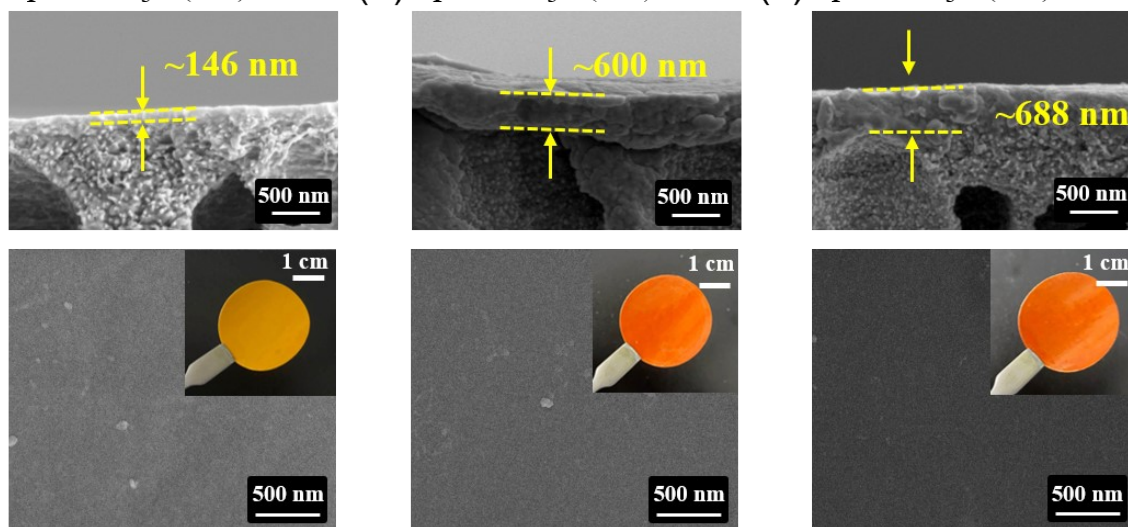

**Fig. S21** SEM images of the TpPa-SO<sub>3</sub>H/PAN membranes prepared via counter-diffusion approach under room temperature.



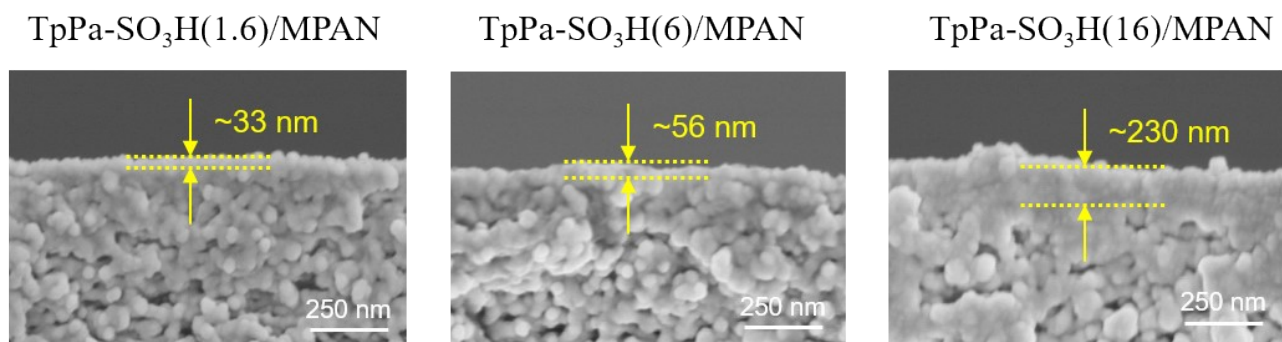

**Fig. S22** Cross-sectional SEM images of the TpPa-SO<sub>3</sub>H/MPAN membranes prepared via *in situ* growth under room temperature.

TpPa-SO<sub>3</sub>H(1.1)/TpPa-SO<sub>3</sub>H(1.6)

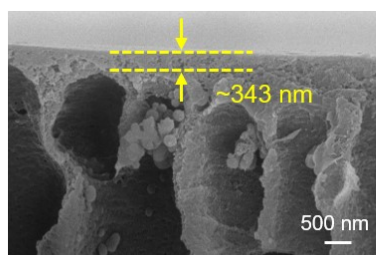

TpPa-SO<sub>3</sub>H(1.1)/TpPa-SO<sub>3</sub>H(6)

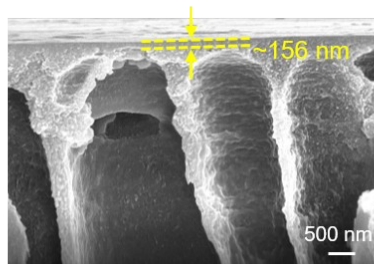

TpPa-SO<sub>3</sub>H(1.1)/TpPa-SO<sub>3</sub>H(16)

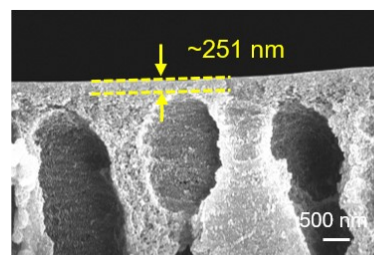

**Fig. S23** Cross-sectional SEM images of the homointerface TpPa-SO<sub>3</sub>H/TpPa-SO<sub>3</sub>H/MPAN membranes.

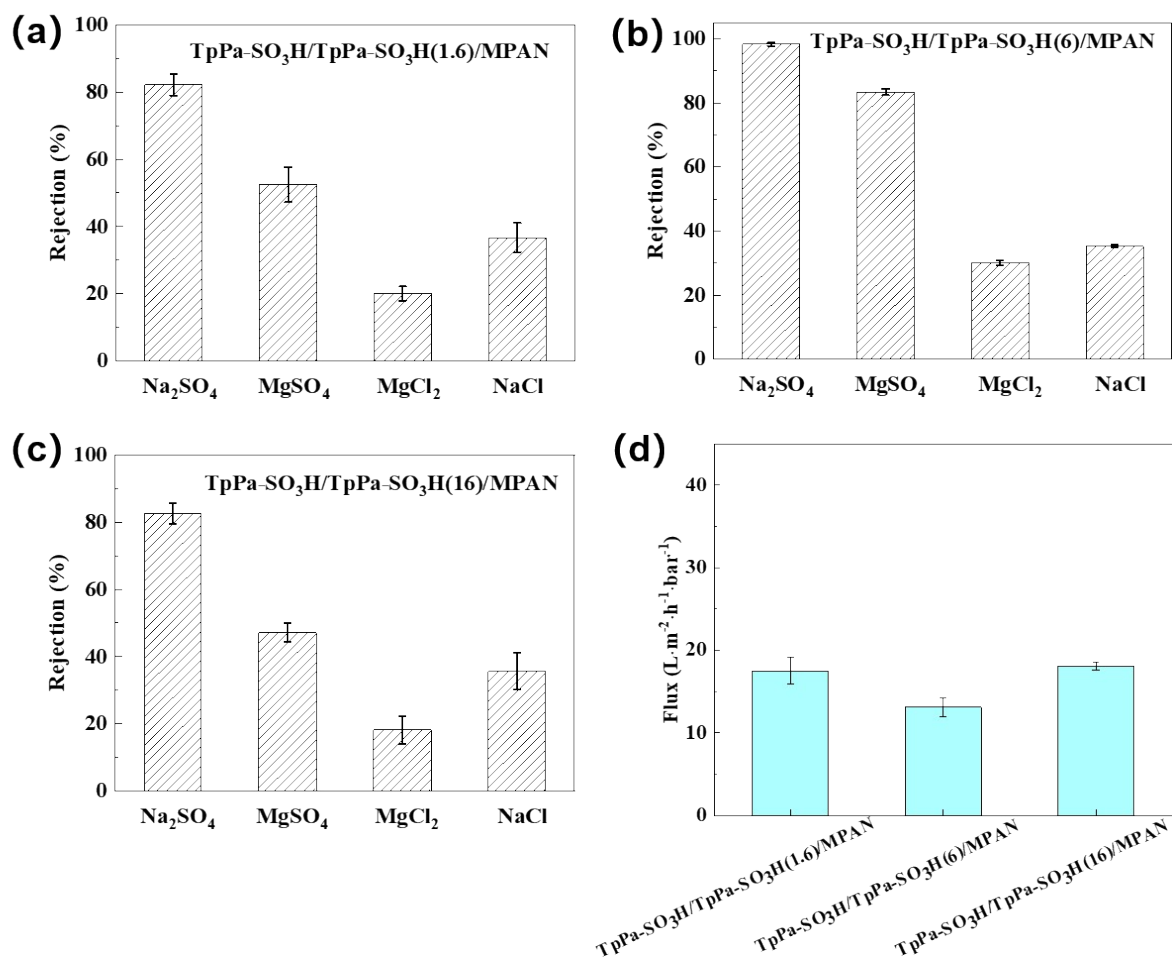

**Fig. S24** Effect of monomer concentration on (a-c) salt rejection and (d) water permeance of homointerface TpPa-SO<sub>3</sub>H(1.1)/TpPa-SO<sub>3</sub>H/MPAN membranes.

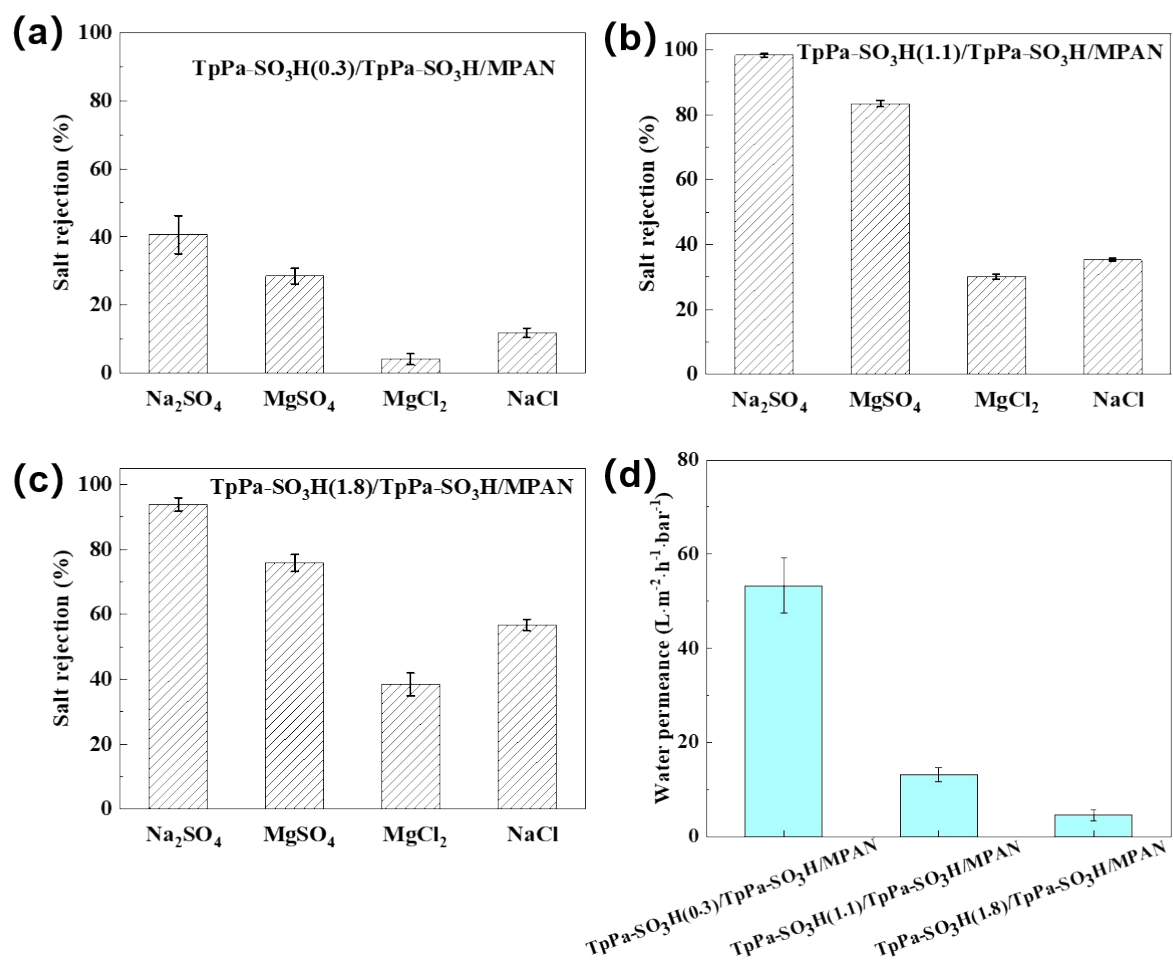

**Fig. S25** Effect of monomer concentration on (a-c) salt rejection and (d) water permeance of homointerface TpPa-SO<sub>3</sub>H/TpPa-SO<sub>3</sub>H(6)/MPAN membranes.

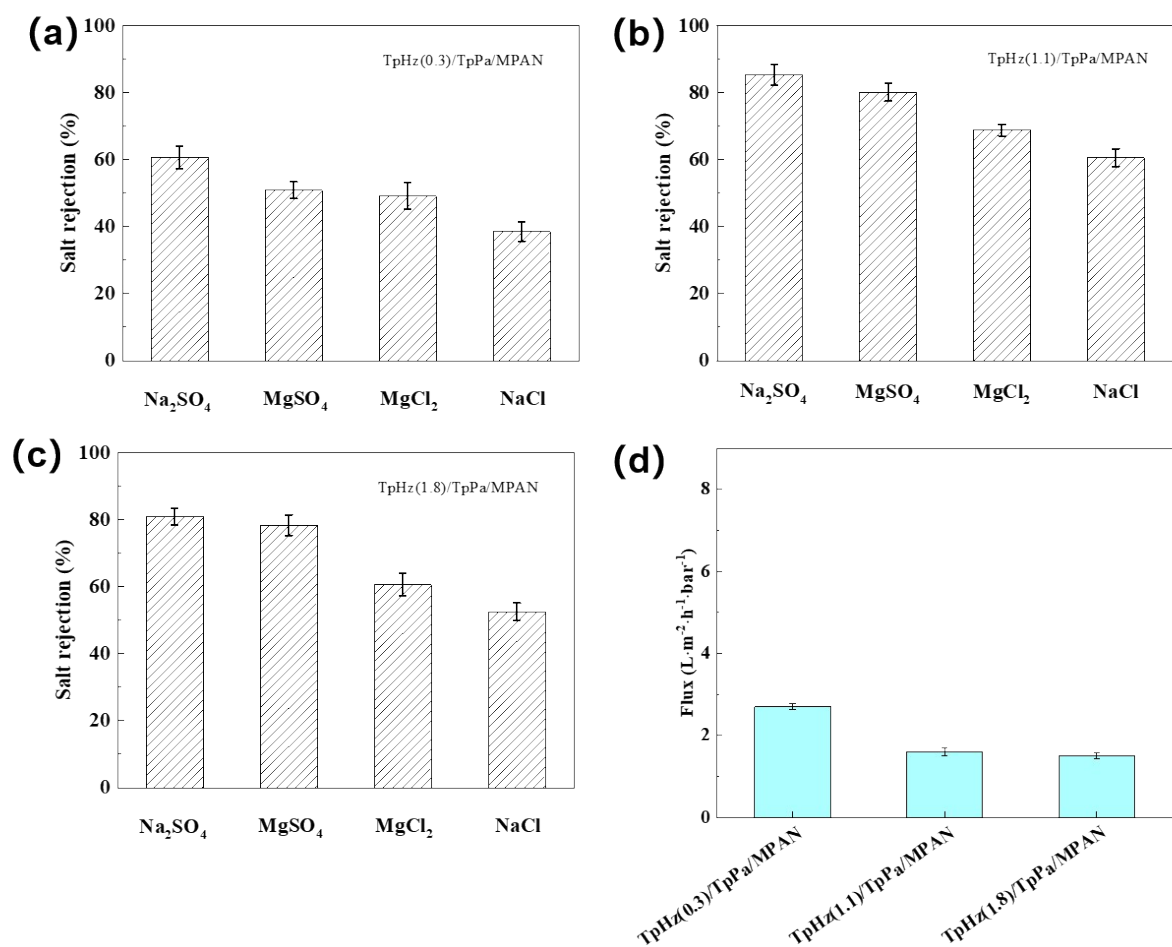

**Fig. S26** Effect of monomer concentration on (a-c) salt rejection and (d) water permeance of homointerface

TpHz/TpPa(6)/MPAN membranes.

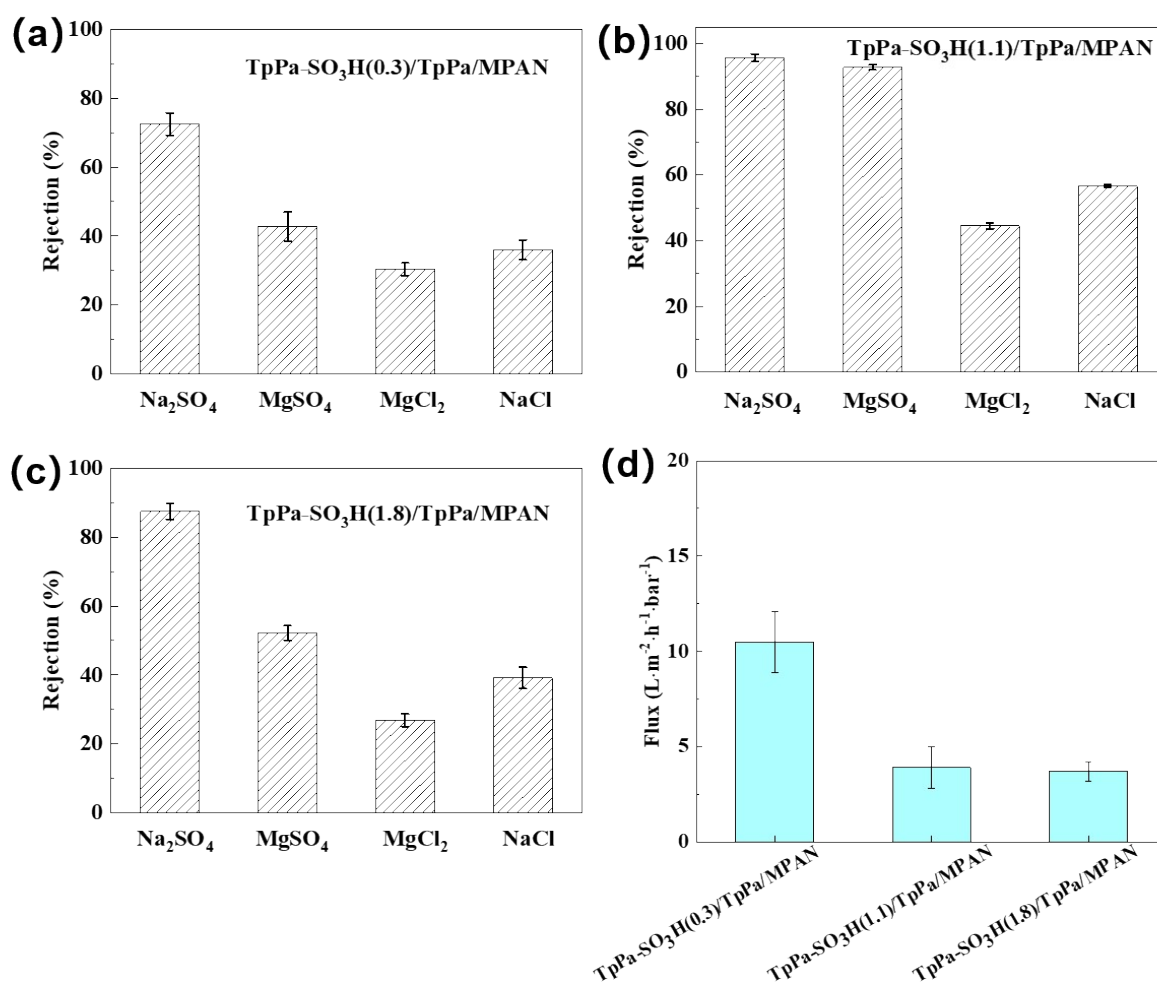

**Fig. S27** Effect of monomer concentration on (a-c) salt rejection and (d) water permeance of homointerface TpPa-SO<sub>3</sub>H/TpPa(6)/MPAN membranes.

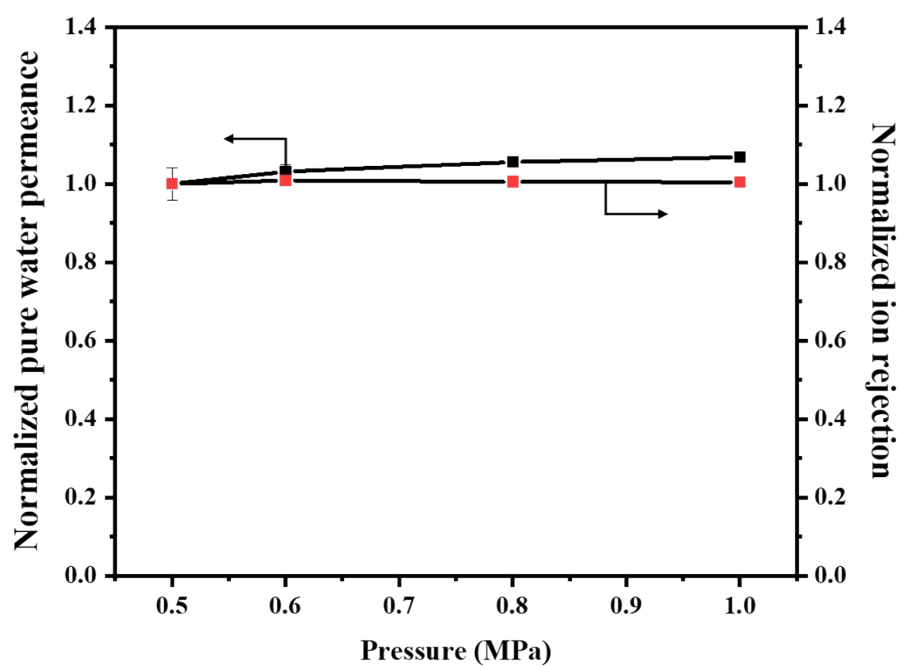

**Fig. S28** The water permeance and  $\text{Na}_2\text{SO}_4$  rejection of the bilayer COF membranes (TpPa-SO<sub>3</sub>H/TpPa-SO<sub>3</sub>H/MPAN) under high pressure.

### 3. Tables

**Table S1.** Single layer COF membranes prepared with various monomer concentrations.

| Membrane                             | PDA deposition<br>time (h) | COF building monomers                       |                                                  |                                              |
|--------------------------------------|----------------------------|---------------------------------------------|--------------------------------------------------|----------------------------------------------|
|                                      |                            | PA concentration<br>(mmol L <sup>-1</sup> ) | DABA<br>concentration<br>(mmol L <sup>-1</sup> ) | TFP concentration<br>(mmol L <sup>-1</sup> ) |
| TpPa(1.6)/MPAN                       | 1                          | 2.4                                         | /                                                | 1.6                                          |
| TpPa(6)/MPAN                         | 1                          | 9                                           | /                                                | 6                                            |
| TpPa(16)/MPAN                        | 1                          | 24                                          | /                                                | 16                                           |
| TpPa-<br>SO <sub>3</sub> H(1.6)/MPAN | 1                          | /                                           | 2.4                                              | 1.6                                          |
| TpPa-SO <sub>3</sub> H(6)/MPAN       | 1                          | /                                           | 9                                                | 6                                            |
| TpPa-SO <sub>3</sub> H(16)/MPAN      | 1                          | /                                           | 24                                               | 16                                           |



**Table S2.** Bilayer COF membranes prepared with different building monomers.

| Membrane                                                         | Monomer concentration of COF         |      |     | Monomer concentration of COF      |      |     |
|------------------------------------------------------------------|--------------------------------------|------|-----|-----------------------------------|------|-----|
|                                                                  | bottom layer (mmol L <sup>-1</sup> ) |      |     | top layer (mmol L <sup>-1</sup> ) |      |     |
|                                                                  | PA                                   | DABA | TFP | N <sub>2</sub> H <sub>4</sub>     | DABA | TFP |
| TpHz(0.3)/TpPa(6)/MPAN                                           | 9.0                                  | /    | 6.0 | 0.5                               | /    | 0.3 |
| TpHz(1.1)/TpPa(6)/MPAN                                           | 9.0                                  | /    | 6.0 | 1.7                               | /    | 1.1 |
| TpHz(1.8)/TpPa(6)/MPAN                                           | 9.0                                  | /    | 6.0 | 2.8                               | /    | 1.8 |
| TpPa-SO <sub>3</sub> H(0.3)/TpPa(6)/MPAN                         | 9.0                                  | /    | 6.0 | /                                 | 0.5  | 0.3 |
| TpPa-SO <sub>3</sub> H(1.1)/TpPa(6)/MPAN                         | 9.0                                  | /    | 6.0 | /                                 | 1.7  | 1.1 |
| TpPa-SO <sub>3</sub> H(1.8)/TpPa(6)/MPAN                         | 9.0                                  | /    | 6.0 | /                                 | 2.8  | 1.8 |
| TpPa-SO <sub>3</sub> H(1.1)/TpPa-SO <sub>3</sub> H(1.6)/MPAN(1#) | /                                    | 2.4  | 1.6 | /                                 | 1.7  | 1.1 |
| TpPa-SO <sub>3</sub> H(1.1)/TpPa-SO <sub>3</sub> H(6)/MPAN(2#)   | /                                    | 9.0  | 6.0 | /                                 | 1.7  | 1.1 |
| TpPa-SO <sub>3</sub> H(1.1)/TpPa-SO <sub>3</sub> H(16)/MPAN(3#)  | /                                    | 24   | 16  | /                                 | 1.7  | 1.1 |
| TpPa-SO <sub>3</sub> H(0.3)/TpPa-SO <sub>3</sub> H(6)/MPAN       | /                                    | 9.0  | 6.0 | /                                 | 0.5  | 0.3 |
| TpPa-SO <sub>3</sub> H(1.1)/TpPa-SO <sub>3</sub> H(6)/MPAN       | /                                    | 9.0  | 6.0 | /                                 | 1.7  | 1.1 |
| TpPa-SO <sub>3</sub> H(1.8)/TpPa-SO <sub>3</sub> H(6)/MPAN       | /                                    | 9.0  | 6.0 | /                                 | 2.8  | 1.8 |

**Table S3.** Spherical neutral solutes with various molecular weights were selected for rejection tests.

| Solutes        | Molecular structure                                                                | Molecular Weight (Da) | Stokes radius (nm) <sup>2</sup> | Rejection (%)   |                                  |                                                    |
|----------------|------------------------------------------------------------------------------------|-----------------------|---------------------------------|-----------------|----------------------------------|----------------------------------------------------|
|                |                                                                                    |                       |                                 | TpHz/TpPa /MPAN | TpPa-SO <sub>3</sub> H/TpPa-MPAN | TpPa-SO <sub>3</sub> H/TpPa-SO <sub>3</sub> H-MPAN |
| Isobutanol     | 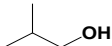  | 74.1                  | 0.279                           | 28.4±1.4        | 15.2±1.8                         | 12.0±2.0                                           |
| Glucose        |   | 180.1                 | 0.358                           | 60.3±2.1        | 53.5±2.2                         | 45.4±2.6                                           |
| Sucrose        |   | 342.2                 | 0.462                           | 83.2±3.2        | 78.0±3.1                         | 77.0±3.3                                           |
| Raffinose      |   | 504.4                 | 0.584                           | 89.0±2.7        | 86.1±1.2                         | 85.1±1.7                                           |
| β-cyclodextrin |  | 1135.0                | 0.742                           | 95.7±2.4        | 96.4±3.5                         | 93.0±2.5                                           |

A series of spherical neutral solutes (isobutanol, glucose, sucrose, raffinose and β-cyclodextrin) were used to estimate the MWCO of the bilayer COF membranes. The rejection rate of 90% is regarded as the MWCO of the membrane. Each solution (100 ppm) was recycled by a home-made cross-flow apparatus at 5.0 bar. The rejection of the solutes was calculated based on equation (1) below, where the concentrations of the permeate ( $C_p$ ) and feed ( $C_f$ ) were measured by a total organic carbon (TOC, HTY-CT1000A, China) analyzer.

$$R = \frac{C_f - C_p}{C_f} \times 100\% \quad (1)$$

The average pore size of the bilayer COF membranes equals the Stokes radius of the spherical solute when the rejection rate reaches 50%. The aperture distribution is expressed as a probability density function and is derived from equation 2 below [1-3]:

$$\frac{dR(r_p)}{dr_p} = \frac{1}{r_p \ln \sigma_p \sqrt{2\pi}} \exp \left[ -\frac{(\ln r_p - \ln \mu_p)^2}{2(\ln \sigma_p)^2} \right] \quad (2)$$

where  $r_p$  refers to Stokes radius of the spherical neutral solute,  $\sigma_p$  refers to the ratio of solute radius at  $R_p=84.13\%$  to

50.0%,  $\mu_p$  refers to the average pore size calculated from Stokes radius of the solutes, respectively.

**Table S4.** Performance comparison of various COF membranes towards salt rejection.

| Membrane                                               | salt                            | Permeance<br>(L m <sup>-2</sup> h <sup>-1</sup> MPa <sup>-1</sup> ) | Rejection (%) | Operation<br>pressure (MPa) | Ref.      |
|--------------------------------------------------------|---------------------------------|---------------------------------------------------------------------|---------------|-----------------------------|-----------|
| FS-COM-1                                               | Na <sub>2</sub> SO <sub>4</sub> | 38.6                                                                | 90-95         | 0.1                         | [4]       |
| IISERP-COOH-<br>COF1                                   | Na <sub>2</sub> SO <sub>4</sub> | 5                                                                   | 96.3          | 0.2                         | [5]       |
| TpHz/PES                                               | Na <sub>2</sub> SO <sub>4</sub> | 40.5                                                                | 58.3          | 0.4                         | [6]       |
| COF-LZU1                                               | Na <sub>2</sub> SO <sub>4</sub> | 760                                                                 | 3.2           | 0.5                         | [7]       |
| COF-LZU1/HPAN                                          | Na <sub>2</sub> SO <sub>4</sub> | 442                                                                 | 63.6          | 0.2                         | [8]       |
| TpPa-1/HPAN                                            | Na <sub>2</sub> SO <sub>4</sub> | 418.5                                                               | 15            | 0.1                         | [9]       |
| COF-LZU1/PES                                           | Na <sub>2</sub> SO <sub>4</sub> | 800                                                                 | 10.8          | 0.2                         | [10]      |
| ACOF-1                                                 | Na <sub>2</sub> SO <sub>4</sub> | 5.6                                                                 | 95.7          | 0.3                         | [11]      |
| TpHz/TpPa/MPA<br>N                                     | Na <sub>2</sub> SO <sub>4</sub> | 16                                                                  | 85.4          | 0.5                         |           |
| TpPa-SO <sub>3</sub> H/TpPa<br>/MPAN                   | Na <sub>2</sub> SO <sub>4</sub> | 39                                                                  | 95.7          | 0.5                         | This work |
| TpPa-SO <sub>3</sub> H/TpPa-<br>SO <sub>3</sub> H/MPAN | Na <sub>2</sub> SO <sub>4</sub> | 131                                                                 | 98.3          | 0.5                         |           |

## 4. References

- [1] J. Gao, S. Sun, W. Zhu and T. Chung, *J. Membr. Sci.*, 2014, 452, 300-310.
- [2] Y. Liang, Y. Zhu, C. Liu, K. Lee, W. Hung, Z. Wang, Y. Li, M. Elimelech, J. Jin and S. Lin, *Nat. Commun.*, 2020, 11, 2015.
- [3] Y. Li, X. You, Y. Li, J. Yuan, J. Shen, R. Zhang, H. Wu, Y. Su and Z. Jiang, *J. Mater. Chem. A*, 2020, 8, 23930-23938.
- [4] Y. Li, Q. Wu, X. Guo, M. Zhang, B. Chen, G. Wei, X. Li, X. Li, S. Li and L. Ma, *Nat. Commun.*, 2020, 11, 1-9.
- [5] C. Liu, Y. Jiang, A. Nalaparaju, J. Jiang and A. Huang, *J. Mater. Chem. A*, 2019, 7, 24205-24210.
- [6] R. Wang, M. Wei and Y. Wang, *J. Membr. Sci.*, 2020, 604, 118090.
- [7] H. Fan, J. Gu, H. Meng, A. Knebel and J. Caro, *Angew. Chem. Int. Ed.*, 2018, 57, 4083-4087.
- [8] C. Yin, S. Fang, X. Shi, Z. Zhang and Y. Wang, *J. Membr. Sci.*, 2020, 618, 118727.
- [9] F. Pan, W. Guo, Y. Su, N. Khan, H. Yang and Z. Jiang, *Sep. Purif. Technol.*, 2019, 215, 582-589.
- [10] Y. Su, X. Yan, Y. Chen, X. Guo, X. Chen and W. Lang, *J. Membr. Sci.*, 2021, 618, 118706.
- [11] A. Xiao, X. Shi, Z. Zhang, C. Yin, S. Xiong and Y. Wang, *J. Membr. Sci.*, 2021, 624, 119122.
